# Supplementary material
Source: HighWire-hosted journal article supplement (https://bmjopen.bmj.com/content/13/12/e079095)
Supplement: inline-supplementary-material-1 [file inline-supplementary-material-1.pdf]

**ID:** \_\_\_\_\_ **Date:** \_\_\_\_\_

**Instructions:** This scale is designed to record your assessment of any sleep difficulty you might have experienced. Please complete this scale before, and 1,3, and 7 days after the examination. All scales will be finally e-mailed to the designated anesthesiologist.

|                                                                                               | <b>0</b>     | <b>1</b>                | <b>2</b>                | <b>3</b>                                    |
|-----------------------------------------------------------------------------------------------|--------------|-------------------------|-------------------------|---------------------------------------------|
| <b>1. Sleep induction (the time it takes you to fall asleep after turning off the lights)</b> | No problem   | Slightly delayed        | Markedly delayed        | Very delayed or did not sleep at all        |
| <b>2. Awakenings during the night</b>                                                         | No problem   | Minor problem           | Considerable problem    | Serious problem or did not sleep at all     |
| <b>3. Final awakening earlier than desired</b>                                                | Not earlier  | A little earlier        | Markedly earlier        | Much earlier or did not sleep at all        |
| <b>4. Total sleep duration</b>                                                                | Sufficient   | Slightly insufficient   | Markedly insufficient   | Very insufficient or did not sleep at all   |
| <b>5. Overall quality of sleep (no matter how long you slept)</b>                             | Satisfactory | Slightly unsatisfactory | Markedly unsatisfactory | Very unsatisfactory or did not sleep at all |
| <b>6. Sense of well-being during the day</b>                                                  | Normal       | Slightly decreased      | Markedly decreased      | Very decreased                              |
| <b>7. Functioning (physical and mental) during the day</b>                                    | Normal       | Slightly decreased      | Markedly decreased      | Very decreased                              |
| <b>8. Sleepiness</b>                                                                          | None         | Mild                    | Considerable            | Intense                                     |

|                |  |  |  |  |
|----------------|--|--|--|--|
| during the day |  |  |  |  |
|----------------|--|--|--|--|
